# Supplementary material
Source: MDPI journal article supplement (https://www.mdpi.com/2073-4395/12/3/728)
Supplement: s1 [file s1]

Table S1. Primers used in the study

| Gene name      | Forward primer (5'-3')                             | Reverse primer (5'-3') | Accession No. |
|----------------|----------------------------------------------------|------------------------|---------------|
| <i>SINCED2</i> | TGGTTTTCATGGGACATTCATTAGCATCTCCCTTCTCAACTCCCTATTCC |                        | EU912387      |
| <i>EF-1α</i>   | GGAACCTTGAGAAGGAGCCTAAG                            | CAACACCAACAGCAACAGTCT  | SGN-U578831   |
